# Supplementary material for: Secretory leukocyte protease inhibitor regulates nerve reflex‐mediated skin barrier function in psoriasis
Source: PubMed Central journal article supplement — J Eur Acad Dermatol Venereol. 2022 Apr 5;36(8):1266–74. doi: 10.1111/jdv.18065 (PMC9546283; doi:10.1111/jdv.18065), 2022-04-05
Supplement: JDV-36-1266-s001.pdf [file JDV-36-1266-s001.pdf]

Figure S1

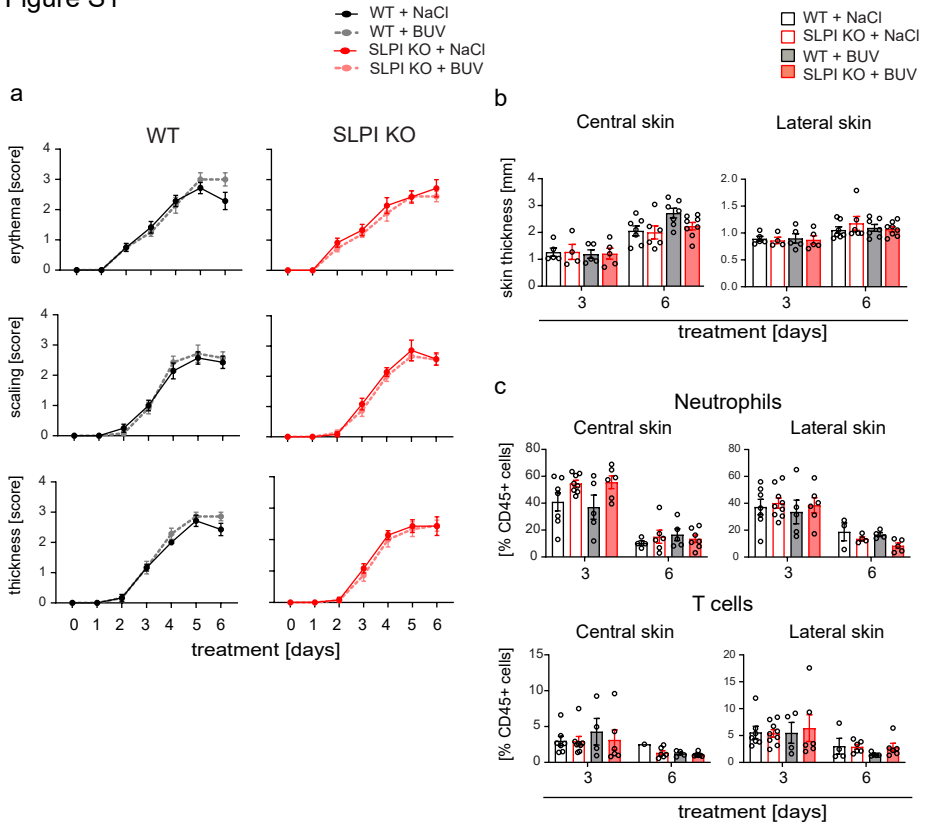

**Figure S1. Skin redness, scaling and thickness as well cutaneous neutrophil and T cell content as are not significantly regulated in IMQ-challenged SLPI KO and WT mice by a nerve-reflex arc.** (a) The mice indicated were treated with 5mM BUUV or vehicle (NaCl) i.d. prior to IMQ treatment, and scored for erythema, scaling and skin thickness at the days indicated of IMQ challenge. n=7-12 WT and 7-15 SLPI KO mice. (b) At days indicated the skinfold thickness in the central and lateral sites was measured using a caliper. Data are shown as mean  $\pm$  SEM. (c) At the days indicated the central and lateral skin was harvested and subjected to flow cytometry analysis. Cells were stained using anti-CD45, anti-CD11b and anti-Ly6G and anti-CD3 mAbs to detect neutrophils and T cells, respectively. Data are shown as a percentage of neutrophils (Ly6G<sup>+</sup>, CD11b<sup>high</sup>) and T cells (CD3<sup>+</sup>) among CD45<sup>+</sup> cells (mean  $\pm$  SEM), n=6-7 mice in each group.
